# Supplementary material for: Croatian 2008-2010 health insurance reform: hard choices toward financial sustainability and efficiency
Source: PubMed Central journal article supplement (PMC3284176; doi:10.3325/cmj.2012.53.66), 2012-02
Supplement: CroatMedJ_53_s002.pdf [file CroatMedJ_53_s002.pdf]

Supplementary Table 2. Public sector expenditure on health as % of total government expenditure, WHO estimates. Source of information: reference (2)

| <b>Years</b>          | <b>2000</b> | <b>2001</b> | <b>2002</b> | <b>2003</b> | <b>2004</b> | <b>2005</b> | <b>2006</b> | <b>2007</b> | <b>2008</b> |
|-----------------------|-------------|-------------|-------------|-------------|-------------|-------------|-------------|-------------|-------------|
| <b>Croatia</b>        | 14.5        | 13.8        | 12.0        | 14.0        | 14.1        | 15.9        | 16.4        | 17.6        | 17.6        |
| <b>Czech Republic</b> | 14.1        | 13.5        | 13.8        | 14.1        | 14.4        | 14.1        | 13.8        | 13.5        | 13.5        |
| <b>Hungary</b>        | 10.6        | 10.4        | 10.4        | 12.3        | 11.9        | 12.0        | 11.3        | 10.5        | 10.5        |
| <b>Slovakia</b>       | 10.7        | 13.2        | 13.6        | 14.0        | 14.1        | 13.8        | 13.6        | 15.1        | 15.0        |
| <b>Slovenia</b>       | 13.1        | 13.3        | 13.6        | 13.4        | 13.4        | 13.5        | 13.5        | 13.2        | 13.2        |
