# Supplementary material for: Croatian 2008-2010 health insurance reform: hard choices toward financial sustainability and efficiency
Source: PubMed Central journal article supplement (PMC3284176; doi:10.3325/cmj.2012.53.66), 2012-02
Supplement: CroatMedJ_53_s003.pdf [file CroatMedJ_53_s003.pdf]

Supplementary table 3. Insured by categories in 2008. Source of information: reference (8)

|                                     | <b>Total</b>     | <b>Proportion</b> |
|-------------------------------------|------------------|-------------------|
| <b>Active persons in employment</b> | 1,582,261        | 36%               |
| <b>Active farmers</b>               | 52,685           | 1%                |
| <b>Pensioners</b>                   | 1,034,635        | 24%               |
| <b>Unemployed</b>                   | 376,447          | 9%                |
| <b>Other insured persons</b>        | 126,560          | 3%                |
| <b>Family members</b>               | 1,190,489        | 27%               |
| <b>Refugees</b>                     | 2,148            | 0%                |
| <b>Total</b>                        | <b>4,365,225</b> | <b>100%</b>       |
