# Supplementary material for: Croatian 2008-2010 health insurance reform: hard choices toward financial sustainability and efficiency
Source: PubMed Central journal article supplement (PMC3284176; doi:10.3325/cmj.2012.53.66), 2012-02
Supplement: CroatMedJ_53_s009.pdf [file CroatMedJ_53_s009.pdf]

Supplementary Table 9: Standard, minimum and maximum number of patients per team in primary health care. Source of information: reference (33)

| Activity                   | Minimum number of patients per team | Standard number of patients per team | Maximum number of patients per team | Average number of patients per team on April 30, 2011 |
|----------------------------|-------------------------------------|--------------------------------------|-------------------------------------|-------------------------------------------------------|
| General Practitioner       | 1,275                               | 1,700                                | 2,125                               | 1,664                                                 |
| Paediatrics                | 715                                 | 950                                  | 1,190                               | 923                                                   |
| Obstetrics and Gynaecology | 4,500                               | 6,000                                | 7,500                               | 5,687                                                 |
| Dental medicine            | 1,650                               | 2,200                                | 2,750                               | 1,957                                                 |

Supplementary Table 10: Primary care teams in medical centres and on concessions

|                            | Number of teams according to the national network | Number of teams under contract with HZZO | Number of teams missing | Percentage of teams working as salaried professionals in medical centres | Percentage of teams private concessionaires on April 30, 2011 |
|----------------------------|---------------------------------------------------|------------------------------------------|-------------------------|--------------------------------------------------------------------------|---------------------------------------------------------------|
| General Practitioner       | 2,462                                             | 2,316                                    | -146                    | 17.3%                                                                    | 82.7%                                                         |
| Paediatrics                | 323                                               | 261                                      | -62                     | 17.7%                                                                    | 82.3%                                                         |
| Obstetrics and Gynaecology | 326                                               | 267                                      | -59                     | 31.2%                                                                    | 68.8%                                                         |
| Dental medicine            | 2,209                                             | 1,919                                    | -290                    | 13.4%                                                                    | 86.6%                                                         |
