# Supplementary material for: Croatian 2008-2010 health insurance reform: hard choices toward financial sustainability and efficiency
Source: PubMed Central journal article supplement (PMC3284176; doi:10.3325/cmj.2012.53.66), 2012-02

Supplementary Figure 1 – Schematic representation of health insurance in Croatia

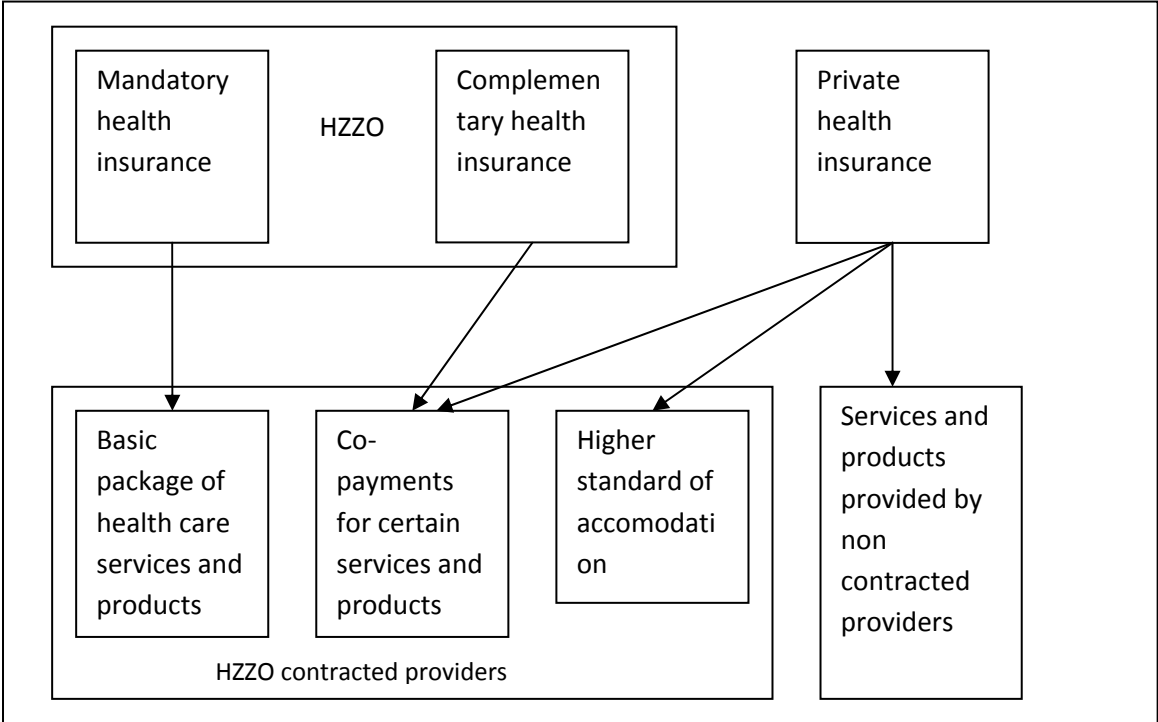

Supplement: CroatMedJ_53_s011.pdf [file CroatMedJ_53_s011.pdf]
